# Supplementary material for: Detecting Individual Sites Subject to Episodic Diversifying Selection
Source: PubMed Central journal article supplement (PMC3395634; doi:10.1371/journal.pgen.1002764), 2012-07-12
Supplement: pgen.1002764.s005.pdf [file pgen.1002764.s005.pdf]

|                                       |            | TreeBase tree                   |         |         |
|---------------------------------------|------------|---------------------------------|---------|---------|
|                                       |            | Tr25302                         | Tr25621 | Tr25483 |
| Mean pairwise divergence              |            | 0.30                            | 0.40    | 0.04    |
| $\omega$                              |            | False Positive Rate at p = 0.05 |         |         |
| Background                            | Foreground |                                 |         |         |
| 0.1                                   | 0.25       | 0                               | 0.0067  | 0.0033  |
| 0.1                                   | 0.5        | 0.0033                          | 0.0033  | 0       |
| 0.1                                   | 0.75       | 0.017                           | 0.02    | 0.013   |
| 0.1                                   | 1.0        | 0.013                           | 0.0067  | 0.01    |
| 0.25                                  | 0.5        | 0.013                           | 0.01    | 0.0033  |
| 0.25                                  | 0.75       | 0.017                           | 0.0067  | 0.0033  |
| 0.25                                  | 1.0        | 0.023                           | 0.017   | 0.017   |
| 0.5                                   | 0.75       | 0.01                            | 0.027   | 0.01    |
| 0.5                                   | 1.0        | 0.027                           | 0.017   | 0.01    |
| 0.75                                  | 1.0        | 0.063                           | 0.03    | 0.013   |
| Prior predictive p<br>(uniform prior) |            | 0.019                           | 0.0143  | 0.008   |
