# Supplementary material for: Detecting Individual Sites Subject to Episodic Diversifying Selection
Source: PubMed Central journal article supplement (PMC3395634; doi:10.1371/journal.pgen.1002764), 2012-07-12
Supplement: pgen.1002764.s008.pdf [file pgen.1002764.s008.pdf]

| Site | MEME MLE |           |       |           |       | FEL MLE  |         | p-value |       | q-value |         | log $L$ |     | FEL result |
|------|----------|-----------|-------|-----------|-------|----------|---------|---------|-------|---------|---------|---------|-----|------------|
|      | $\alpha$ | $\beta^-$ | $q^-$ | $\beta^+$ | $q^+$ | $\alpha$ | $\beta$ | MEME    | FEL   | MEME    | MEME    | FEL     |     |            |
| 5    | 0.00     | 0.00      | 0.99  | 21.94     | 0.01  | 0.00     | 0.09    | 0.001   | 0.306 | 0.01    | -21.36  | -26.80  | +   |            |
| 10   | 0.43     | 0.04      | 0.94  | 5.23      | 0.06  | 0.46     | 0.30    | 0.014   | 0.421 | 0.06    | -88.21  | -93.28  | -   |            |
| 14   | 0.49     | 0.43      | 0.33  | 2.13      | 0.67  | 0.49     | 1.50    | 0.002   | 0.001 | 0.02    | -258.48 | -258.44 | +++ |            |
| 23   | 0.56     | 0.56      | 0.00  | 1.78      | 1.00  | 0.56     | 1.77    | 0.001   | 0.000 | 0.01    | -242.08 | -242.31 | +++ |            |
| 24   | 0.47     | 0.40      | 0.93  | 7.99      | 0.07  | 0.51     | 0.78    | 0.028   | 0.306 | 0.10    | -142.09 | -144.43 | +   |            |
| 25   | 0.37     | 0.37      | 0.97  | 20.44     | 0.03  | 0.41     | 0.75    | 0.000   | 0.162 | 0.00    | -137.31 | -145.78 | +   |            |
| 28   | 1.13     | 0.71      | 0.82  | 8.38      | 0.18  | 1.24     | 1.72    | 0.005   | 0.283 | 0.03    | -290.45 | -294.24 | +   |            |
| 29   | 1.48     | 0.98      | 0.77  | 9.22      | 0.23  | 1.56     | 2.24    | 0.009   | 0.294 | 0.04    | -313.55 | -316.85 | +   |            |
| 30   | 1.12     | 0.00      | 0.50  | 4.16      | 0.50  | 1.23     | 1.89    | 0.003   | 0.220 | 0.02    | -290.80 | -295.29 | +   |            |
| 32   | 1.03     | 0.82      | 0.85  | 13.89     | 0.15  | 1.14     | 2.00    | 0.000   | 0.091 | 0.00    | -282.10 | -288.58 | ++  |            |
| 33   | 1.20     | 1.20      | 0.65  | 15.33     | 0.35  | 1.15     | 4.37    | 0.000   | 0.000 | 0.00    | -417.89 | -421.35 | +++ |            |
| 35   | 1.63     | 1.24      | 0.95  | 49.65     | 0.05  | 1.91     | 1.91    | 0.006   | 0.998 | 0.03    | -304.14 | -309.07 | -   |            |
| 38   | 1.32     | 0.02      | 0.99  | 451.80    | 0.01  | 1.46     | 0.11    | 0.007   | 0.000 | 0.04    | -107.46 | -114.40 | --- |            |
| 40   | 0.17     | 0.00      | 0.57  | 2.73      | 0.43  | 0.18     | 1.10    | 0.000   | 0.000 | 0.00    | -161.27 | -162.85 | +++ |            |
| 45   | 1.16     | 0.00      | 0.94  | 13.48     | 0.06  | 1.19     | 0.34    | 0.020   | 0.001 | 0.08    | -155.58 | -160.53 | --- |            |
| 47   | 1.13     | 0.94      | 0.87  | 10.56     | 0.13  | 1.10     | 1.68    | 0.043   | 0.253 | 0.14    | -269.74 | -270.92 | +   |            |
| 50   | 0.96     | 0.26      | 0.73  | 14.61     | 0.27  | 1.16     | 2.46    | 0.000   | 0.029 | 0.00    | -223.17 | -231.39 | +++ |            |
| 51   | 1.77     | 0.87      | 0.93  | 78.83     | 0.07  | 2.20     | 1.77    | 0.000   | 0.416 | 0.00    | -319.15 | -336.07 | -   |            |
| 52   | 2.83     | 0.92      | 0.81  | 16.40     | 0.19  | 3.03     | 2.44    | 0.002   | 0.427 | 0.02    | -394.70 | -404.91 | -   |            |
| 53   | 2.10     | 1.45      | 0.80  | 15.89     | 0.20  | 2.35     | 3.00    | 0.009   | 0.386 | 0.04    | -388.44 | -391.86 | +   |            |
| 54   | 1.18     | 1.18      | 0.72  | 11.28     | 0.28  | 1.14     | 3.11    | 0.000   | 0.001 | 0.00    | -381.61 | -387.42 | +++ |            |
| 55   | 1.35     | 1.35      | 0.90  | 16.20     | 0.10  | 1.34     | 2.22    | 0.007   | 0.071 | 0.04    | -309.51 | -312.19 | ++  |            |
| 56   | 1.74     | 0.84      | 0.80  | 9.75      | 0.20  | 1.82     | 2.06    | 0.017   | 0.647 | 0.07    | -292.04 | -295.47 | +   |            |
| 67   | 0.37     | 0.00      | 0.99  | 58.55     | 0.01  | 0.37     | 0.12    | 0.032   | 0.079 | 0.11    | -70.71  | -73.48  | --  |            |
| 68   | 0.15     | 0.00      | 0.96  | 7.17      | 0.04  | 0.15     | 0.18    | 0.004   | 0.856 | 0.02    | -47.92  | -53.85  | +   |            |
| 72   | 0.50     | 0.46      | 0.93  | 69.05     | 0.07  | 1.09     | 1.16    | 0.000   | 0.877 | 0.00    | -245.26 | -270.83 | +   |            |
| 75   | 0.62     | 0.58      | 0.98  | 74.85     | 0.02  | 0.70     | 0.83    | 0.001   | 0.650 | 0.01    | -175.98 | -182.09 | +   |            |
| 80   | 0.73     | 0.00      | 0.75  | 5.56      | 0.25  | 0.80     | 1.15    | 0.000   | 0.358 | 0.00    | -178.17 | -184.45 | +   |            |
| 83   | 0.00     | 0.00      | 0.96  | 11.15     | 0.04  | 0.00     | 0.16    | 0.023   | 0.864 | 0.09    | -63.14  | -66.08  | +   |            |
| 92   | 0.06     | 0.05      | 0.99  | 188.42    | 0.01  | 0.13     | 0.13    | 0.038   | 0.966 | 0.13    | -44.61  | -47.08  | -   |            |
