# Supplementary material for: Detecting Individual Sites Subject to Episodic Diversifying Selection
Source: PubMed Central journal article supplement (PMC3395634; doi:10.1371/journal.pgen.1002764), 2012-07-12
Supplement: pgen.1002764.s011.pdf [file pgen.1002764.s011.pdf]

| Site | MEME MLE |           |       |           |       | FEL MLE  |         | p-value |       | q-value |        | log $L$ |       | FEL result |
|------|----------|-----------|-------|-----------|-------|----------|---------|---------|-------|---------|--------|---------|-------|------------|
|      | $\alpha$ | $\beta^-$ | $q^-$ | $\beta^+$ | $q^+$ | $\alpha$ | $\beta$ | MEME    | FEL   | MEME    | MEME   | FEL     |       |            |
| 5    | 1.17     | 0.00      | 0.98  | 25.18     | 0.02  | 1.16     | 0.07    | 0.037   | 0.000 | 1.00    | -37.84 | -43.42  | - - - |            |
