# Supplementary material for: Detecting Individual Sites Subject to Episodic Diversifying Selection
Source: PubMed Central journal article supplement (PMC3395634; doi:10.1371/journal.pgen.1002764), 2012-07-12
Supplement: pgen.1002764.s012.pdf [file pgen.1002764.s012.pdf]

| Site | MEME MLE |           |       |           |       | FEL MLE  |         | p-value |       | q-value | log $L$ |        | FEL result |
|------|----------|-----------|-------|-----------|-------|----------|---------|---------|-------|---------|---------|--------|------------|
|      | $\alpha$ | $\beta^-$ | $q^-$ | $\beta^+$ | $q^+$ | $\alpha$ | $\beta$ | MEME    | FEL   | MEME    | MEME    | FEL    |            |
| 43   | 0.20     | 0.00      | 0.92  | 3.42      | 0.08  | 0.21     | 0.07    | 0.030   | 0.213 | 1.00    | -26.26  | -30.83 | -          |
| 45   | 0.16     | 0.00      | 0.90  | 19.24     | 0.10  | 0.38     | 0.08    | 0.021   | 0.049 | 1.00    | -40.23  | -43.44 | - - -      |
| 126  | 0.00     | 0.00      | 0.68  | 1.04      | 0.32  | 0.07     | 0.24    | 0.039   | 0.507 | 1.00    | -37.44  | -39.58 | +          |
| 175  | 0.10     | 0.00      | 0.85  | 5.54      | 0.15  | 0.23     | 0.11    | 0.029   | 0.434 | 1.00    | -32.87  | -36.49 | -          |
