# Supplementary material for: Detecting Individual Sites Subject to Episodic Diversifying Selection
Source: PubMed Central journal article supplement (PMC3395634; doi:10.1371/journal.pgen.1002764), 2012-07-12
Supplement: pgen.1002764.s017.pdf [file pgen.1002764.s017.pdf]

| Site | MEME MLE |           |       |           |       | FEL MLE  |         | p-value |       | q-value | log $L$ |        | FEL result |
|------|----------|-----------|-------|-----------|-------|----------|---------|---------|-------|---------|---------|--------|------------|
|      | $\alpha$ | $\beta^-$ | $q^-$ | $\beta^+$ | $q^+$ | $\alpha$ | $\beta$ | MEME    | FEL   | MEME    | MEME    | FEL    |            |
| 33   | 2.71     | 0.00      | 0.83  | 105.37    | 0.17  | 2.71     | 1.36    | 0.018   | 0.369 | 1.00    | -54.24  | -57.81 | -          |
| 242  | 0.00     | 0.00      | 0.00  | 1.19      | 1.00  | 0.00     | 1.19    | 0.027   | 0.018 | 1.00    | -22.04  | -22.08 | +++        |
| 327  | 1.87     | 0.00      | 0.92  | 1622.27   | 0.08  | 4.45     | 0.69    | 0.005   | 0.020 | 1.00    | -38.71  | -43.06 | ---        |
| 366  | 0.79     | 0.00      | 0.91  | 93.78     | 0.09  | 0.80     | 0.60    | 0.024   | 0.775 | 1.00    | -29.59  | -32.60 | -          |
