# Supplementary material for: Detecting Individual Sites Subject to Episodic Diversifying Selection
Source: PubMed Central journal article supplement (PMC3395634; doi:10.1371/journal.pgen.1002764), 2012-07-12
Supplement: pgen.1002764.s020.pdf [file pgen.1002764.s020.pdf]

| Site | MEME MLE |           |       |           |       | FEL MLE  |         | p-value |       | q-value | log $L$ |        |            |
|------|----------|-----------|-------|-----------|-------|----------|---------|---------|-------|---------|---------|--------|------------|
|      | $\alpha$ | $\beta^-$ | $q^-$ | $\beta^+$ | $q^+$ | $\alpha$ | $\beta$ | MEME    | FEL   | MEME    | MEME    | FEL    | FEL result |
| 142  | 0.00     | 0.00      | 0.98  | 1370.53   | 0.02  | 0.00     | 0.74    | 0.046   | 0.282 | 1.00    | -12.42  | -14.16 | +          |
