# Supplementary material for: Detecting Individual Sites Subject to Episodic Diversifying Selection
Source: PLoS Genet. 2012 Jul 12;8(7):e1002764. doi: 10.1371/journal.pgen.1002764 (PMC3395634; doi:10.1371/journal.pgen.1002764)
Supplement: Table S11 — Positively selected sites in HIV-1 reverse transcriptase (rt). stands for a positively selected site and stands for a negatively selected site (FEL ). and reflect borderline significant sites (FEL p between and ). and denote significant sites (FEL ). (PDF) [file pgen.1002764.s014.pdf]

| Site             | MEME MLE |           |       |           |       | FEL MLE  |         | p-value |       | q-value | log $L$ |         | FEL result |
|------------------|----------|-----------|-------|-----------|-------|----------|---------|---------|-------|---------|---------|---------|------------|
|                  | $\alpha$ | $\beta^-$ | $q^-$ | $\beta^+$ | $q^+$ | $\alpha$ | $\beta$ | MEME    | FEL   | MEME    | MEME    | FEL     |            |
| 35               | 0.18     | 0.00      | 0.72  | 6.92      | 0.28  | 0.24     | 1.82    | 0.000   | 0.006 | 0.01    | -120.50 | -123.64 | +          |
| 48               | 0.23     | 0.21      | 0.99  | 67.77     | 0.01  | 0.24     | 0.56    | 0.000   | 0.140 | 0.00    | -106.53 | -116.48 | +          |
| 64               | 0.15     | 0.14      | 0.99  | 109.00    | 0.01  | 0.15     | 0.33    | 0.000   | 0.238 | 0.00    | -75.53  | -82.69  | +          |
| 69* <sup>a</sup> | 0.72     | 0.00      | 0.94  | 10.00     | 0.06  | 0.72     | 0.53    | 0.001   | 0.481 | 0.03    | -140.39 | -148.35 | -          |
| 75*              | 0.73     | 0.09      | 0.99  | 31.26     | 0.01  | 0.79     | 0.31    | 0.002   | 0.053 | 0.04    | -104.06 | -112.08 | --         |
| 102              | 0.00     | 0.00      | 0.10  | 0.32      | 0.90  | 0.00     | 0.29    | 0.006   | 0.003 | 0.10    | -58.62  | -58.61  | +++        |
| 103*             | 1.25     | 0.00      | 0.70  | 21.77     | 0.30  | 1.26     | 3.49    | 0.000   | 0.001 | 0.00    | -601.48 | -608.64 | +++        |
| 104              | 1.76     | 0.12      | 1.00  | 258.43    | 0.00  | 1.76     | 0.21    | 0.041   | 0.000 | 0.49    | -109.41 | -113.91 | ---        |
| 121              | 0.89     | 0.00      | 0.96  | 18.87     | 0.04  | 0.90     | 0.44    | 0.031   | 0.165 | 0.39    | -135.78 | -139.20 | -          |
| 122              | 1.30     | 1.07      | 0.99  | 255.69    | 0.01  | 1.33     | 1.38    | 0.000   | 0.911 | 0.00    | -236.76 | -244.79 | +          |
| 138*             | 0.31     | 0.02      | 0.99  | 22.56     | 0.01  | 0.31     | 0.17    | 0.026   | 0.318 | 0.33    | -67.10  | -70.78  | -          |
| 151*             | 1.00     | 0.00      | 0.99  | 77.12     | 0.01  | 0.99     | 0.42    | 0.000   | 0.036 | 0.00    | -113.27 | -130.34 | ---        |
| 162              | 1.42     | 0.25      | 0.93  | 31.90     | 0.07  | 1.46     | 1.29    | 0.000   | 0.722 | 0.00    | -312.23 | -329.05 | -          |
| 163              | 0.89     | 0.00      | 1.00  | 65.44     | 0.00  | 0.89     | 0.05    | 0.007   | 0.000 | 0.11    | -59.71  | -67.16  | ---        |
| 165              | 0.08     | 0.08      | 0.00  | 0.52      | 1.00  | 0.08     | 0.52    | 0.024   | 0.015 | 0.32    | -106.07 | -106.11 | +++        |
| 181*             | 2.71     | 0.14      | 0.98  | 73.02     | 0.02  | 2.70     | 0.60    | 0.000   | 0.000 | 0.00    | -152.20 | -168.14 | ---        |
| 184*             | 0.03     | 0.03      | 0.85  | 12.66     | 0.15  | 3.41     | 1.01    | 0.011   | 0.253 | 0.16    | -264.90 | -272.98 | -          |
| 188*             | 0.14     | 0.00      | 0.99  | 98.56     | 0.01  | 0.14     | 0.40    | 0.000   | 0.272 | 0.00    | -65.21  | -85.19  | +          |
| 190*             | 1.32     | 0.00      | 0.95  | 21.32     | 0.05  | 1.53     | 0.48    | 0.006   | 0.002 | 0.10    | -207.52 | -213.04 | ---        |
| 200              | 0.23     | 0.23      | 0.00  | 2.34      | 1.00  | 0.23     | 2.33    | 0.000   | 0.000 | 0.00    | -297.77 | -297.91 | +++        |
| 207              | 2.06     | 0.00      | 0.78  | 16.31     | 0.22  | 2.17     | 2.41    | 0.002   | 0.712 | 0.04    | -344.68 | -349.50 | +          |
| 211              | 0.78     | 0.78      | 0.00  | 2.11      | 1.00  | 0.78     | 2.09    | 0.001   | 0.000 | 0.02    | -312.84 | -312.93 | +++        |
| 213              | 3.33     | 0.00      | 1.00  | 8820.96   | 0.00  | 3.42     | 0.03    | 0.010   | 0.000 | 0.16    | -150.83 | -155.48 | ---        |
| 215*             | 0.57     | 0.00      | 0.98  | 75.10     | 0.02  | 0.57     | 0.41    | 0.000   | 0.465 | 0.00    | -118.46 | -138.17 | -          |
| 228              | 1.42     | 0.05      | 0.99  | 165.25    | 0.01  | 1.66     | 0.25    | 0.000   | 0.000 | 0.00    | -141.08 | -156.14 | ---        |
| 245              | 0.36     | 0.36      | 0.71  | 14.11     | 0.29  | 0.40     | 3.28    | 0.000   | 0.000 | 0.00    | -406.70 | -411.28 | +++        |
| 248              | 0.09     | 0.09      | 0.00  | 1.14      | 1.00  | 0.09     | 1.14    | 0.043   | 0.030 | 0.50    | -100.45 | -100.39 | +++        |
| 272              | 0.13     | 0.00      | 0.90  | 89.62     | 0.10  | 0.19     | 1.76    | 0.000   | 0.003 | 0.00    | -138.33 | -145.41 | +++        |
| 286              | 0.49     | 0.49      | 0.00  | 2.08      | 1.00  | 0.49     | 2.07    | 0.011   | 0.006 | 0.15    | -105.80 | -105.86 | +++        |

<sup>a</sup>Substitutions at codons marked with \* are associated with the development of drug resistance to RT inhibitors (Johnson et al., 2010).
